# Supplementary material for: π-4f charge-transfer emission in a trivalent europium complex
Source: Research Square preprint supplement (doi:10.21203/rs.3.rs-4252624/v1), 2024-05-29
Supplement: Supplementary file 1 [file 4acc21262b439191d16a6e8f.pdf]

## Supporting Information

### $\pi$ -4f charge-transfer emission in a trivalent europium complex

Yuichi Kitagawa<sup>1,2\*</sup>, Toranosuke Tomikawa<sup>3</sup>, Kota Aikawa<sup>3</sup>, Shiori Miyazaki<sup>4</sup>, Tomoko Akama<sup>2</sup>,  
Masato Kobayashi<sup>2,5</sup>, Mengfei Wang<sup>2</sup>, Sunao Shoji<sup>6</sup>, Koji Fushimi<sup>1</sup>, Kiyoshi Miyata<sup>4</sup>, Yuichi Hirai<sup>7</sup>,  
Takayuki Nakanishi<sup>7</sup>, Ken Onda<sup>4</sup>, Tetsuya Taketsugu<sup>2,5</sup>, and Yasuchika Hasegawa<sup>1,2\*</sup>

<sup>1</sup>Faculty of Engineering, Hokkaido University, Kita 13, Nishi 8, Kita-ku, Sapporo, Hokkaido 060–  
8628, Japan.

<sup>2</sup>Institute for Chemical Reaction Design and Discovery (WPI-ICReDD), Hokkaido University, Kita  
21, Nishi 10, Kita-ku Sapporo, Hokkaido 001-0021, Japan.

<sup>3</sup>Graduate School of Chemical Sciences and Engineering, Hokkaido University, Kita 13, Nishi 8,  
Sapporo, Hokkaido 060-8628, Japan.

<sup>4</sup>Department of Chemistry, Kyushu University, 744 Motooka, Nishi, Fukuoka 829-0395, Japan.

<sup>5</sup>Faculty of Science, Hokkaido University, Kita 10, Nishi 8, Kita-ku, Sapporo, Hokkaido 060-0810  
Japan.

<sup>6</sup>Department of Engineering, Nara Women's University, Kitauoya-Nishimachi, Nara 630-8506,  
Japan.

<sup>7</sup>National Institute for Materials Science, 1-1 Namiki, Tsukuba, Ibaraki 305-0044, Japan.

## S1. Chemical structures

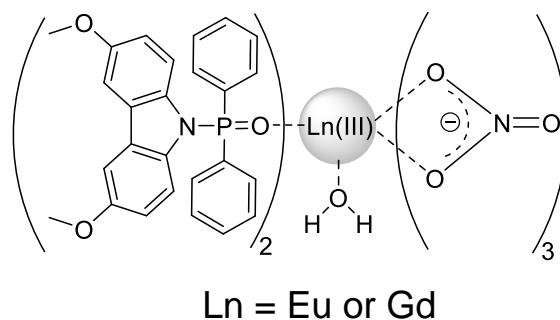

**Figure S1.** Chemical structures of nine-coordinated Eu(III) (**Eu-MCPO-H<sub>2</sub>O**) and Gd(III) (**Gd-MCPO-H<sub>2</sub>O**) complexes.

## S2. Experimental section

**Computational details:** All quantum chemical calculations were performed using the density functional theory (DFT) using the Gaussian 16 package.<sup>S1</sup> The ground state geometry optimization was carried out using DFT with the B3LYP-D3 functional,<sup>S2-S4</sup> and the investigation into excited states utilized time-dependent DFT (TD-DFT) with the long-range corrected (LC) BLYP functional.<sup>S5-S7</sup> The Stuttgart RECP basis set<sup>S8</sup> was adopted for Eu atoms, and for the remaining atoms, including C, H, N, O, and P, the cc-pVDZ basis set<sup>S9-S10</sup> was used. The solvent effect was considered using the Polarizable Continuum Model (PCM) method.<sup>S11</sup> GaussSumS17 was employed to assess atomic orbital contributions to the molecular orbitals (MOs).

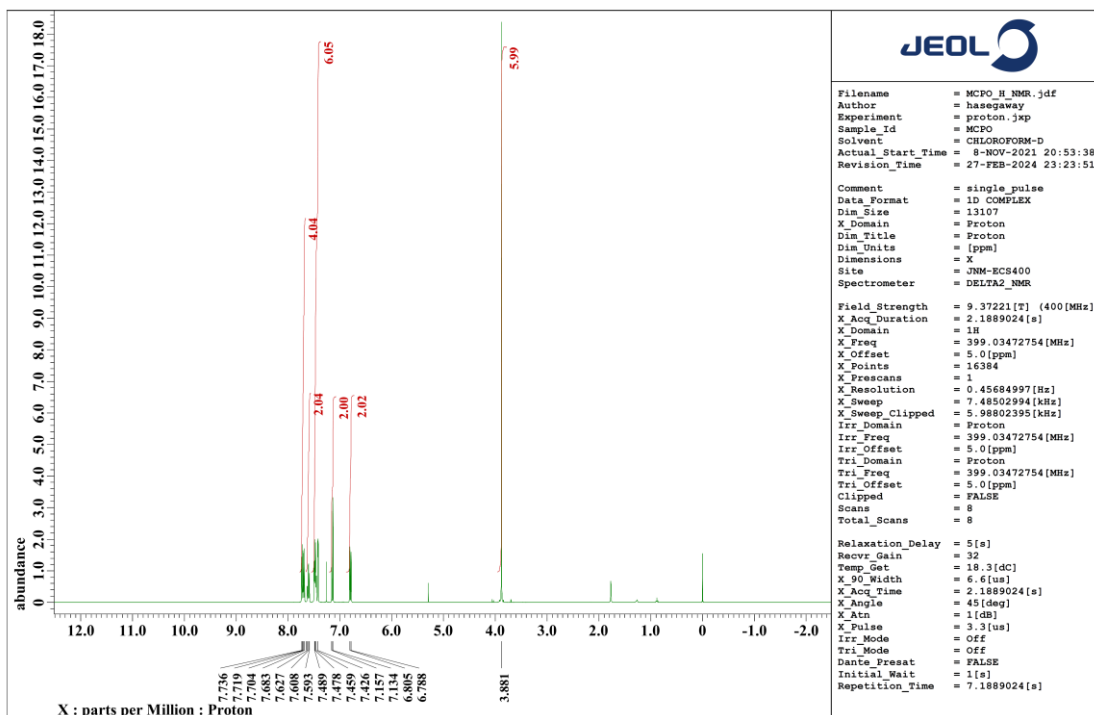

Figure S2.  $^1\text{H}$  NMR chart of MCPO

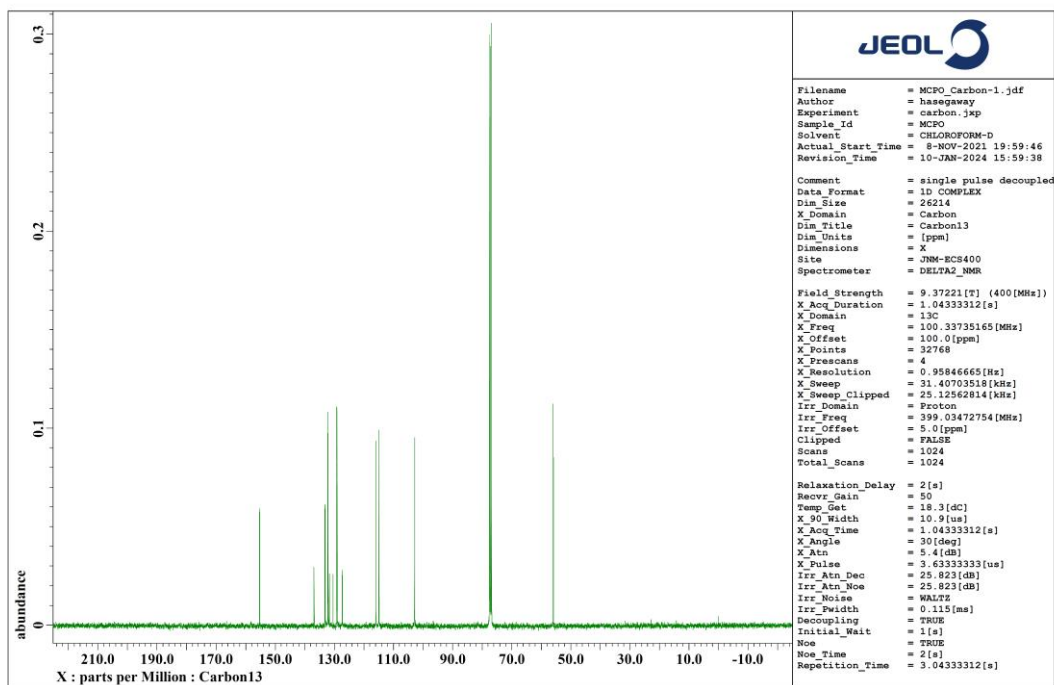

Figure S3.  $^{13}\text{C}$  NMR chart of MCPO

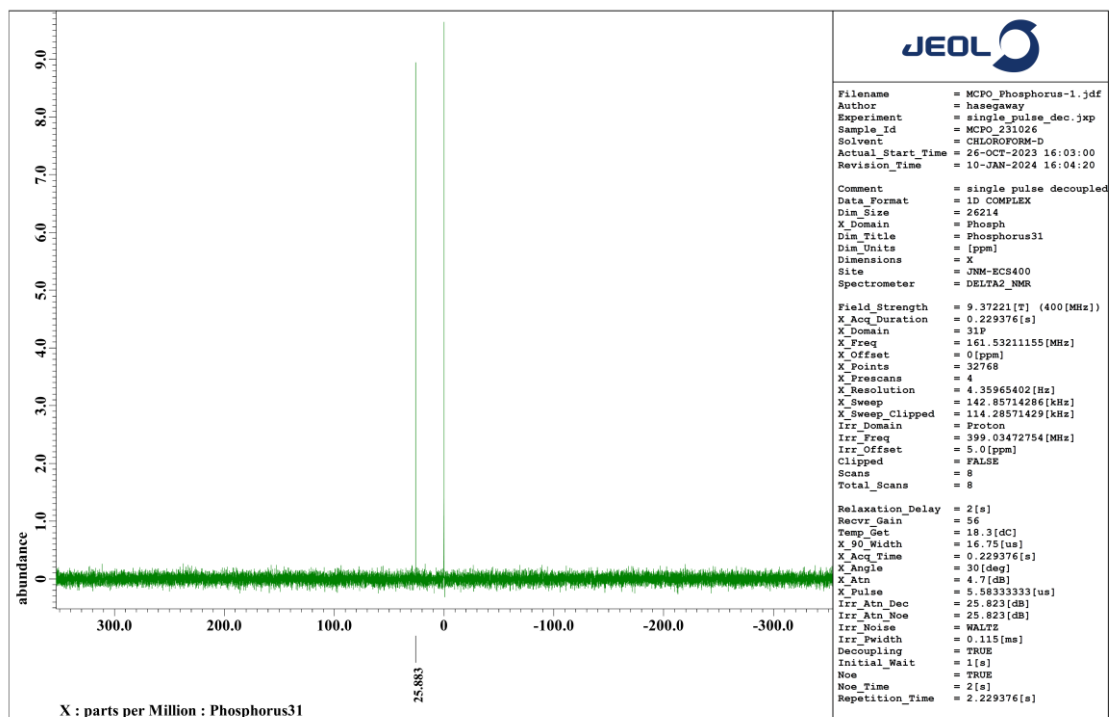

**Figure S4.**  $^{31}\text{P}$  NMR chart of MCPO

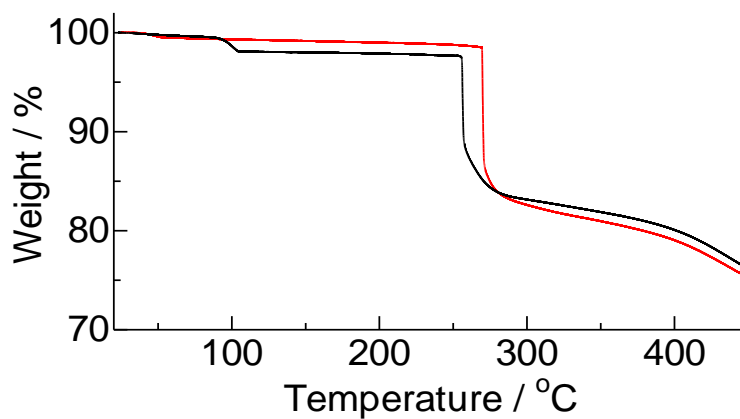

**Figure S5.** TG-DTA profiles of **Eu-MCPO-H<sub>2</sub>O** (black line) and **Eu-MCPO** (red line).

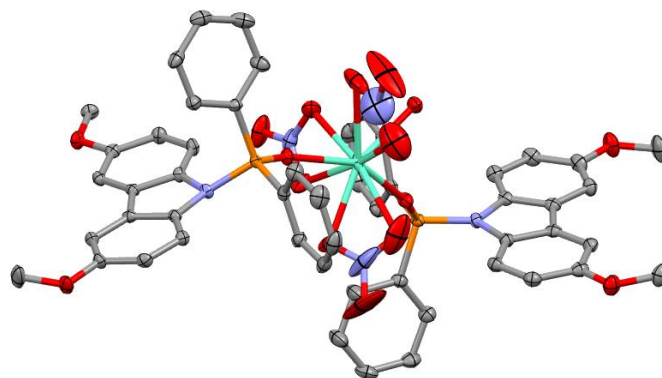

**Figure S6.** ORTEP drawings (ellipsoids set at 50 % probability) of **Eu-MCPO-H<sub>2</sub>O**. Gray spheres represent carbon; red spheres, oxygen; purple spheres, nitrogen; orange spheres, phosphorus; and green spheres, europium.

**Table S1.** Crystallographic data for **Eu-MCPO-H<sub>2</sub>O**

|                                               | <b>Eu-MCPO-H<sub>2</sub>O</b>                                                   |
|-----------------------------------------------|---------------------------------------------------------------------------------|
| Chemical formula                              | C <sub>52</sub> H <sub>46</sub> EuN <sub>5</sub> O <sub>16</sub> P <sub>2</sub> |
| Formula weight                                | 1210.84                                                                         |
| Crystal system                                | Triclinic                                                                       |
| Space group                                   | <i>P</i> -1                                                                     |
| <i>a</i> / Å                                  | 9.7632(4)                                                                       |
| <i>b</i> / Å                                  | 12.0671(4)                                                                      |
| <i>c</i> / Å                                  | 22.2933(9)                                                                      |
| <i>α</i> /deg.                                | 98.853(3)                                                                       |
| <i>β</i> /deg.                                | 94.890(3)                                                                       |
| <i>γ</i> /deg.                                | 102.897(3)                                                                      |
| Volume / Å <sup>3</sup>                       | 2510.12(17)                                                                     |
| <i>Z</i>                                      | 2                                                                               |
| Temperature / K                               | 1.602                                                                           |
| <i>d</i> <sub>calc</sub> / g cm <sup>-3</sup> | –150                                                                            |
| <i>R</i> <sub>1</sub>                         | 0.0411                                                                          |
| <i>wR</i> <sub>2</sub>                        | 0.1048                                                                          |

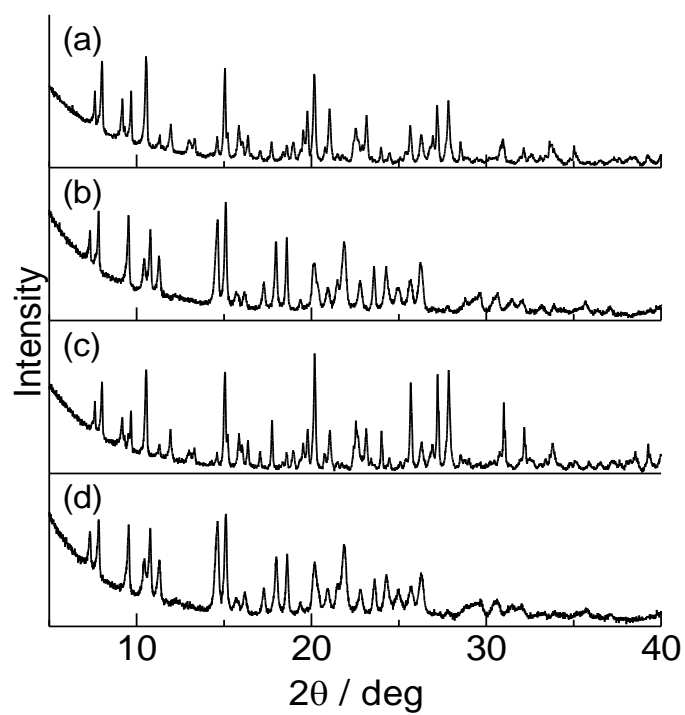

**Figure S7.** PXRD patterns of (a) **Eu-MCPO-H<sub>2</sub>O**, (b) **Eu-MCPO**, (c) **Gd-MCPO-H<sub>2</sub>O**, (d) **Gd-MCPO**

### S3. Quantum chemical calculation and additional photophysical measurements

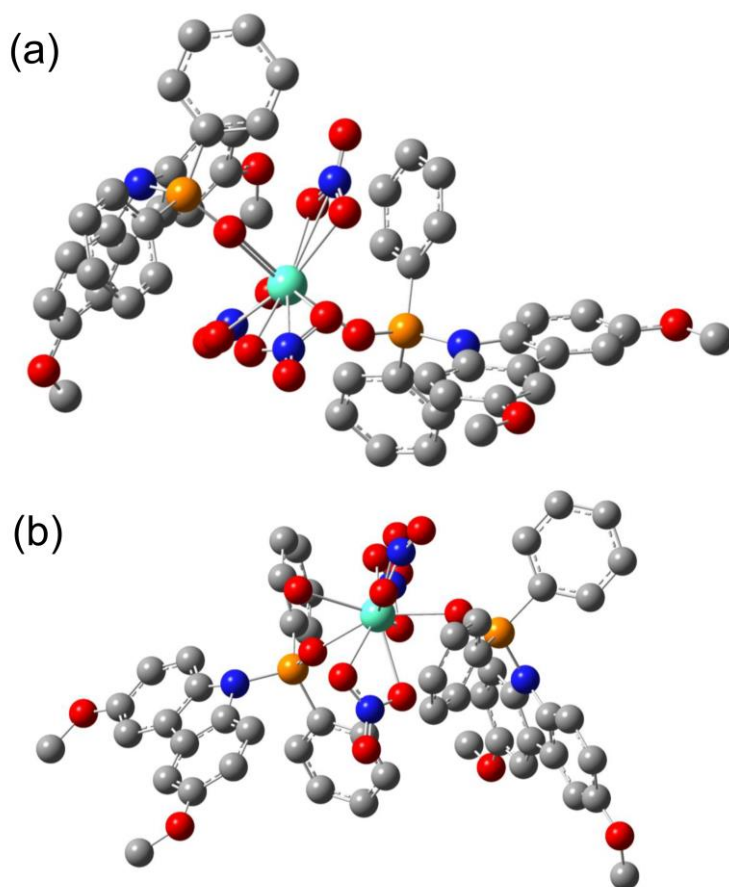

**Figure S8.** Optimized structure of (a) **Eu-MCPO** [average Eu–O (NO<sub>3</sub>): 2.474 Å, average Eu–O (MCPO): 2.321 Å] and (b) **Eu-MCPO-H<sub>2</sub>O** [average Eu–O (NO<sub>3</sub>): 2.482 Å, average Eu–O (MCPO): 2.386 Å] in the ground state obtained by DFT calculations with vacuum condition. Gray spheres represent carbon; red spheres, oxygen; blue spheres, nitrogen; orange spheres, phosphorus; and green spheres, europium.

**Table S2.** Electronic transition properties in ground state of **Eu-MCPO** obtained by TDDFT

calculation using the optimized structure (Figure S8).

| <b>Ex</b> | $\lambda/\text{nm}$ | $f/-$  | Main contribution |          | Assignment                   |
|-----------|---------------------|--------|-------------------|----------|------------------------------|
| 7         | 501                 | 0.0000 | 290A→296A         | 0.45300  | $\pi_{(\text{MCPO})}-$       |
|           |                     |        | 284B→289B         | -0.44198 | $\pi^*_{(\text{MCPO/NO}_3)}$ |
| 8         | 491                 | 0.0000 | 288A→295A         | 0.45911  | $\pi_{(\text{MCPO})}-$       |
|           |                     |        | 282B→288B         | -0.45833 | $\pi^*_{(\text{MCPO})}$      |
| 9         | 419                 | 0.0019 | 290A→292A         | 0.65816  | $\pi_{(\text{MCPO})}-4f$     |
|           |                     |        | 289A→292A         | 0.63347  |                              |
| 10        | 417                 | 0.0000 | 278B→287B         | 0.29122  | $\pi_{(\text{MCPO})}-$       |
|           |                     |        | 284B→294A         | -0.28775 | $\pi^*_{(\text{MCPO})}$      |
|           |                     |        | 284A→305A         | 0.27570  |                              |
|           |                     |        | 285A→305A         | 0.27515  |                              |
|           |                     |        | 279B→299B         | -0.26416 |                              |
|           |                     |        | 278B→299B         | -0.25636 |                              |
| 11        | 414                 | 0.0000 | 282A→293A         | -0.34534 | $\pi_{(\text{MCPO})}-$       |
|           |                     |        | 276B→286B         | 0.34529  | $\pi^*_{(\text{MCPO})}$      |
|           |                     |        | 277B→296B         | -0.27442 |                              |
| 12        | 411                 | 0.0000 | 280A→301A         | 0.39328  | $\pi_{(\text{MCPO})}-$       |
|           |                     |        | 272B→287B         | 0.36658  | $\pi^*_{(\text{MCPO})}$      |
|           |                     |        | 278A→294A         | -0.36432 |                              |
|           |                     |        | 274B→295B         | -0.32955 |                              |
|           |                     |        | 274B→293B         | -0.25671 |                              |
| 13        | 411                 | 0.0000 | 275B→294B         | -0.33412 | $\pi_{(\text{MCPO})}-$       |
|           |                     |        | 282A→297A         | 0.32890  | $\pi^*_{(\text{MCPO})}$      |
|           |                     |        | 281A→300A         | 0.30253  |                              |
|           |                     |        | 276B→290B         | -0.26360 |                              |
| 14        | 392                 | 0.0000 | 289A→292A         | 0.71210  | $\pi_{(\text{MCPO})}-4f$     |
|           |                     |        | 290A→292A         | -0.56611 |                              |

**Table S3.** Atomic orbital contribution to MOs appearing in the main configuration of the lowest

$\pi$ -4f charge transfer excited state of **Eu-MCPO** using the optimized structure (9th excited state in

Table S2). There is very small mixing of the  $\pi$  orbitals of MCPO and the 4f orbital of Eu.

| <b>MO</b> | 4f      | MCPO-1  | MCPO-2  | NO <sub>3</sub> |
|-----------|---------|---------|---------|-----------------|
| 289A      | 0.00055 | 0.00101 | 0.99311 | 0.00421         |
| 290A      | 0.00018 | 0.00028 | 0.99396 | 0.00541         |
| 292A      | 0.95262 | 0.00402 | 0.00436 | 0.03611         |



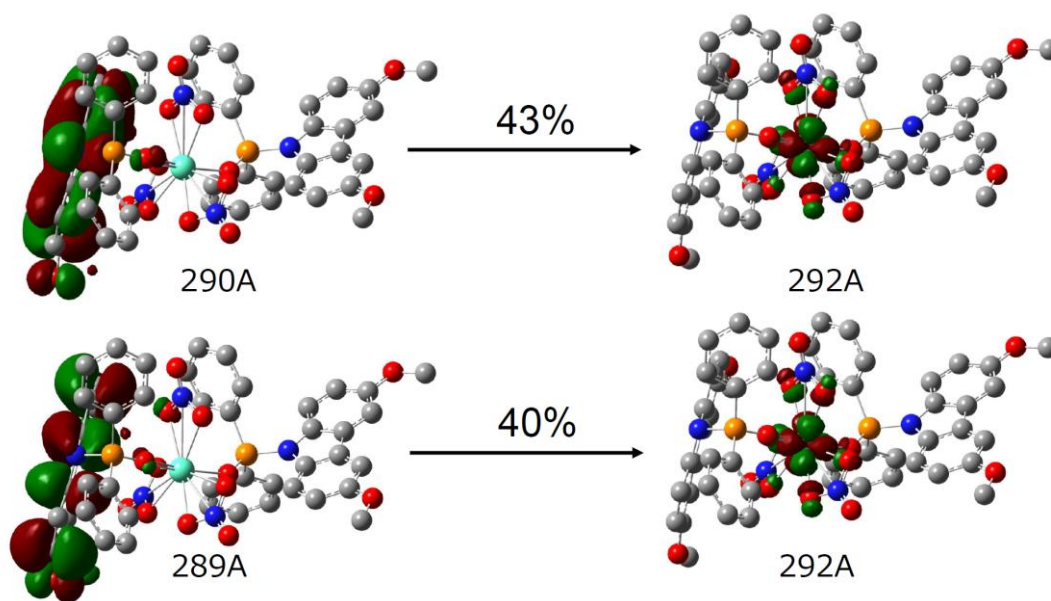

**Figure S9.** Transition orbital analysis of the lowest  $\pi$ -4f CT excited state of **Eu-MCPO** using the optimized structure (9th excited state in Table S2).

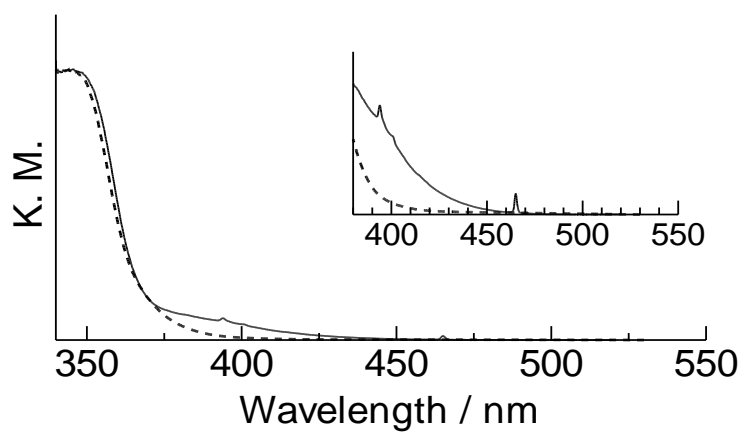

**Figure S10.** Diffuse reflectance spectra of **Eu-MCPO-H<sub>2</sub>O** (black solid line) and **Gd-MCPO-H<sub>2</sub>O** (black broken line).

**Table S4.** Electronic transition properties in the ground state of **Eu-MCPO-H<sub>2</sub>O** obtained by TDDFT calculations using (a) the crystal structure (Figure S6) and (b) the optimized structure (Figure S8(b)).

(a)

| Ex | $\lambda/\text{nm}$ | f / -  | Main contribution |          | Assignment                                                                    |
|----|---------------------|--------|-------------------|----------|-------------------------------------------------------------------------------|
| 7  | 510                 | 0.0000 | 288A→305A         | 0.37781  | $\pi_{(\text{MCPO}\&\text{NO}_3)}-$                                           |
|    |                     |        | 282B→298B         | -0.35019 | $\pi^*_{(\text{MCPO}\&\text{NO}_3)}$                                          |
| 8  | 464                 | 0.0000 | 295A→302A         | 0.30516  | $\pi_{(\text{MCPO})}-\pi^*_{(\text{MCPO})}$                                   |
|    |                     |        | 289B→295B         | -0.30325 |                                                                               |
|    |                     |        | 289B→293B         | -0.27940 |                                                                               |
|    |                     |        | 295A→300A         | 0.27797  |                                                                               |
| 9  | 462                 | 0.0000 | 293A→299A         | 0.47485  | $\pi_{(\text{MCPO})}-\pi^*_{(\text{MCPO})}$                                   |
|    |                     |        | 287B→292B         | -0.47462 |                                                                               |
| 10 | 440                 | 0.0000 | 291A→305A         | 0.48578  | $n_{(\text{NO}_3)}-$<br>$\pi^*_{(\text{MCPO}\&\text{NO}_3)}$                  |
|    |                     |        | 285B→298B         | -0.44973 |                                                                               |
|    |                     |        | 291A→304A         | 0.33925  |                                                                               |
|    |                     |        | 285B→297B         | -0.32301 |                                                                               |
| 11 | 432                 | 0.0010 | 291A→297A         | 0.85038  | $n_{(\text{NO}_3)}-4f$                                                        |
|    |                     |        | 271A→297A         | -0.32844 |                                                                               |
| 12 | 396                 | 0.0000 | 278B→295B         | 0.30626  | $\pi_{(\text{MCPO})}-\pi^*_{(\text{MCPO})}$                                   |
|    |                     |        | 284A→302A         | -0.30350 |                                                                               |
| 13 | 395                 | 0.0000 | 278A→298A         | 0.42064  | $\pi_{(\text{MCPO})}-\pi^*_{(\text{MCPO})}$                                   |
|    |                     |        | 272B→291B         | -0.41800 |                                                                               |
| 14 | 395                 | 0.0094 | 283A→297A         | 0.82692  | $n_{(\text{NO}_3)}-4f$                                                        |
| 15 | 389                 | 0.0080 | 280A→297A         | 0.68227  | $n_{(\text{NO}_3)}\&\pi_{(\text{MCPO})}-$<br>$4f$                             |
|    |                     |        | 281A→297A         | 0.45394  |                                                                               |
| 16 | 389                 | 0.0000 | 282A→301A         | 0.42235  | $\pi_{(\text{MCPO})}-\pi^*_{(\text{MCPO})}$                                   |
|    |                     |        | 276B→294B         | -0.40204 |                                                                               |
|    |                     |        | 279B→301B         | -0.40085 |                                                                               |
|    |                     |        | 285A→307A         | -0.40064 |                                                                               |
| 17 | 388                 | 0.0000 | 283B→304B         | 0.37198  | $\pi_{(\text{MCPO}\&\text{NO}_3)}-$<br>$\pi^*_{(\text{MCPO}(\&\text{NO}_3))}$ |
|    |                     |        | 289A→310A         | 0.34732  |                                                                               |
| 18 | 374                 | 0.0000 | 291A→305A         | 0.49707  | $n-\pi^*_{(\text{MCPO}\&\text{NO}_3)}$                                        |
|    |                     |        | 285B→298B         | 0.45840  |                                                                               |
| 19 | 373                 | 0.0000 | 290B→293B         | 0.36972  | $\pi_{(\text{MCPO})}-\pi^*_{(\text{MCPO})}$                                   |
|    |                     |        | 296A→300A         | -0.36831 |                                                                               |
|    |                     |        | 292A→314A         | 0.28553  |                                                                               |
|    |                     |        | 286B→313B         | -0.27802 |                                                                               |
|    |                     |        | 296A→302A         | -0.27318 |                                                                               |
| 20 | 365                 | 0.0005 | 288A→297A         | 0.68684  | $\pi_{(\text{MCPO}\&\text{NO}_3)}-4f$                                         |
|    |                     |        | 289A→297A         | 0.42195  |                                                                               |
| 21 | 360                 | 0.0000 | 288B→292B         | 0.45393  | $\pi_{(\text{MCPO})}-\pi^*_{(\text{MCPO})}$                                   |
|    |                     |        | 294A→299A         | -0.45387 |                                                                               |
| 22 | 351                 | 0.0002 | 296A→297A         | 0.94852  | $\pi_{(\text{MCPO})}-4f$                                                      |

(b)

| Ex | $\lambda/\text{nm}$ | f / -  | Main contribution |          | Assignment                                      |
|----|---------------------|--------|-------------------|----------|-------------------------------------------------|
| 7  | 493                 | 0.0000 | 294A→301A         | 0.40227  | $\pi_{(\text{MCPO})}-\pi^*_{(\text{MCPO})}$     |
|    |                     |        | 288B→294B         | -0.39842 |                                                 |
| 8  | 493                 | 0.0000 | 287B→292B         | 0.41522  | $\pi_{(\text{MCPO})}-\pi^*_{(\text{MCPO})}$     |
|    |                     |        | 293A→299A         | -0.41499 |                                                 |
| 9  | 416                 | 0.0000 | 290A→310A         | 0.40290  | $\pi_{(\text{MCPO})}-\pi^*_{(\text{MCPO})}$     |
|    |                     |        | 284B→304B         | -0.40150 |                                                 |
|    |                     |        | 289A→300A         | 0.32688  |                                                 |
|    |                     |        | 283B→293B         | -0.32322 |                                                 |
| 10 | 413                 | 0.0000 | 280B→299B         | -0.35208 | $\pi_{(\text{MCPO})}-\pi^*_{(\text{MCPO})}$     |
|    |                     |        | 286A→305A         | 0.34557  |                                                 |
|    |                     |        | 277B→291B         | -0.29061 |                                                 |
|    |                     |        | 283A→298A         | 0.28906  |                                                 |
|    |                     |        | 283A→299A         | -0.26018 |                                                 |
|    |                     |        | 277B→292B         | 0.26012  |                                                 |
| 11 | 411                 | 0.0000 | 284A→300A         | -0.32316 | $\pi_{(\text{MCPO})}-\pi^*_{(\text{MCPO})}$     |
|    |                     |        | 284A→303A         | 0.30423  |                                                 |
|    |                     |        | 278B→293B         | 0.31969  |                                                 |
|    |                     |        | 278B→296B         | -0.30061 |                                                 |
|    |                     |        | 281B→300B         | -0.33739 |                                                 |
| 12 | 410                 | 0.0000 | 279B→295B         | -0.35548 | $\pi_{(\text{MCPO})}-\pi^*_{(\text{MCPO})}$     |
|    |                     |        | 285A→302A         | -0.35754 |                                                 |
| 13 | 379                 | 0.0000 | 296A→301A         | 0.37264  | $\pi_{(\text{MCPO})}-\pi^*_{(\text{MCPO})}$     |
|    |                     |        | 296A→315A         | 0.27748  |                                                 |
|    |                     |        | 290B→294B         | -0.36880 |                                                 |
| 14 | 369                 | 0.0000 | 291A→311A         | 0.29128  | $\pi_{(\text{MCPO})}-\pi^*_{(\text{MCPO})}$     |
|    |                     |        | 295A→298A         | -0.26786 |                                                 |
|    |                     |        | 285B→306B         | -0.27611 |                                                 |
|    |                     |        | 289B→291B         | 0.26757  |                                                 |
| 15 | 368                 | 0.0077 | 279A→297A         | -0.48263 | $\pi_{(\text{NO}_3)}\&\pi_{(\text{MCPO})}-4f$   |
|    |                     |        | 281A→297A         | 0.48876  |                                                 |
|    |                     |        | 282A→297A         | 0.58075  |                                                 |
| 16 | 358                 | 0.0026 | 279A→297A         | -0.54273 | $\pi_{(\text{MCPO})}\&\pi_{(\text{NO}_3)}-4f$   |
|    |                     |        | 282A→297A         | -0.45014 |                                                 |
|    |                     |        | 296A→297A         | 0.57932  |                                                 |
| 17 | 355                 | 0.0012 | 279A→297A         | 0.45459  | $\pi_{(\text{MCPO})}(\&\pi_{(\text{NO}_3)})-4f$ |
|    |                     |        | 296A→297A         | 0.75266  |                                                 |

**Table S5.** Atomic orbital contribution to MOs appearing in the main configuration of the first and second lowest  $\pi$ -4f CT excited states of **Eu-MCPO-H<sub>2</sub>O** using the crystal structure (15th and 22nd excited state in Table S4(a)). There is very small mixing of the  $\pi$  orbitals of MCPO and the 4f orbital of Eu.

| MO   | 4f      | MCPO-1  | MCPO-2  | NO <sub>3</sub> |
|------|---------|---------|---------|-----------------|
| 280A | 0.00697 | 0.33658 | 0.04773 | 0.59187         |
| 281A | 0.00309 | 0.66503 | 0.03255 | 0.29097         |
| 296A | 0.00002 | 0.99967 | 0.00001 | 0.00036         |
| 297A | 0.95422 | 0.00261 | 0.00301 | 0.03957         |

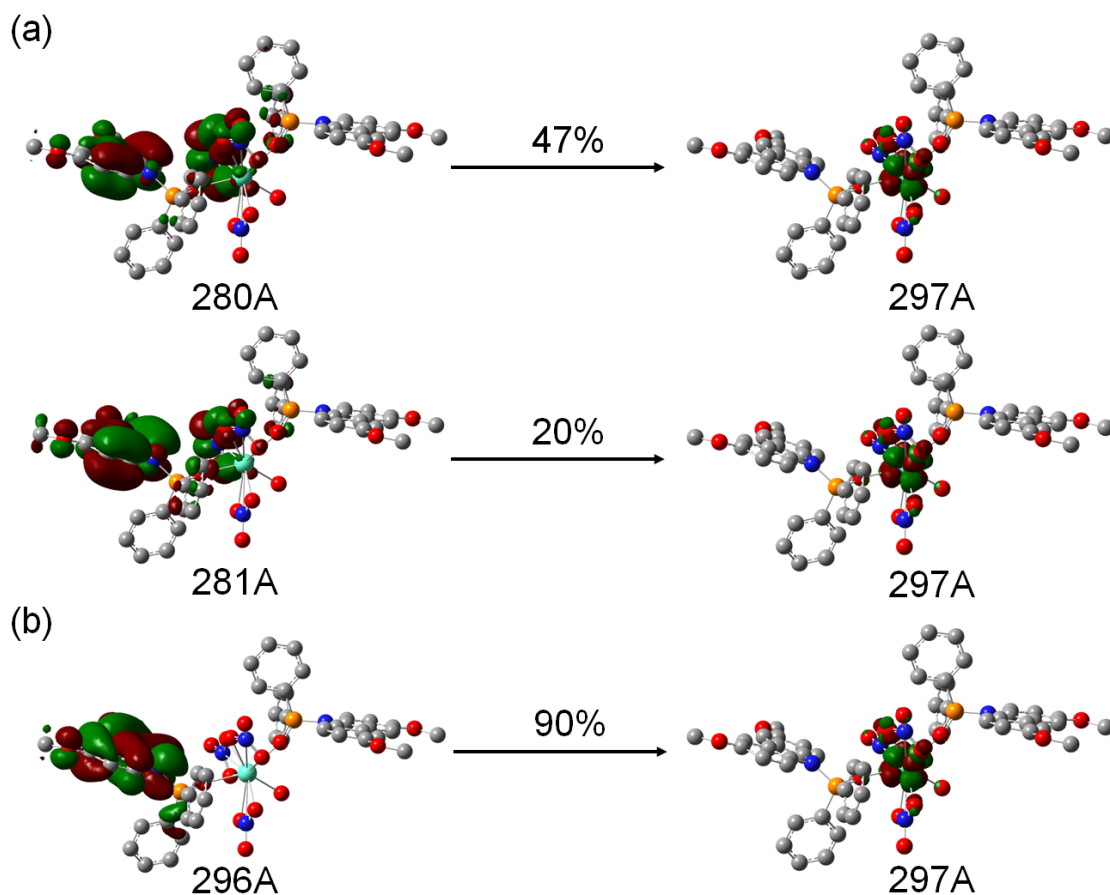

**Figure S11.** Transition orbital analysis of the (a) first and (b) second lowest  $\pi$ -4f CT excited states of **Eu-MCPO-H<sub>2</sub>O** using the crystal structure (15th and 22nd excited state in Table S4(a)).

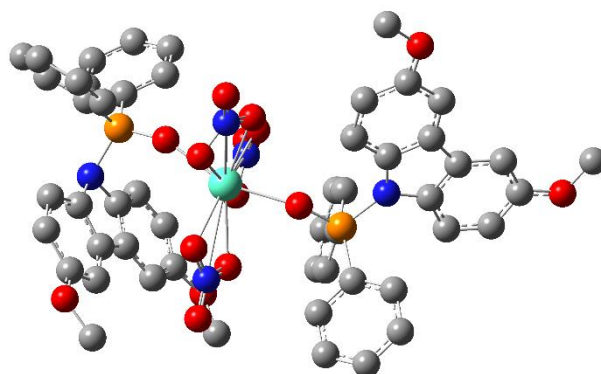

**Figure S12.** Optimized structure of **Eu-MCPO** in THF solvent [average Eu-O (NO<sub>3</sub>): 2.491 Å, average Eu-O (MCPO): 2.322 Å] in the ground state obtained by DFT calculations with PCM method.

**Table S6.** Electronic transition properties in ground state of **Eu-MCPO** in THF solvent obtained

by TDDFT calculation using optimized structure (Figure S12).

| <b>Ex</b> | $\lambda/\text{nm}$ | $f / -$ | Main contribution |          | Assignment                   |
|-----------|---------------------|---------|-------------------|----------|------------------------------|
| 7         | 499                 | 0.0000  | 290A→296A         | 0.32225  | $\pi_{(\text{MCPO})^-}$      |
|           |                     |         | 289A→296A         | -0.31225 | $\pi^*_{(\text{MCPO/NO}_3)}$ |
|           |                     |         | 283B→289B         | 0.30689  |                              |
|           |                     |         | 284B→289B         | -0.31491 |                              |
| 8         | 490                 | 0.0000  | 286A→295A         | -0.29431 | $\pi_{(\text{MCPO})^-}$      |
|           |                     |         | 288A→295A         | 0.44289  | $\pi^*_{(\text{MCPO})}$      |
|           |                     |         | 282B→288B         | -0.43968 |                              |
| 9         | 445                 | 0.0013  | 290A→292A         | 0.96338  | $\pi_{(\text{MCPO})-4f}$     |
| 10        | 415                 | 0.0000  | 284A→294A         | -0.25978 | $\pi_{(\text{MCPO})^-}$      |
|           |                     |         | 284A→305A         | -0.30418 | $\pi^*_{(\text{MCPO})}$      |
|           |                     |         | 285A→294A         | 0.24852  |                              |
|           |                     |         | 278B→287B         | 0.26355  |                              |
|           |                     |         | 278B→299B         | 0.29712  |                              |
|           |                     |         | 279B→287B         | -0.24862 |                              |
| 11        | 414                 | 0.0003  | 289A→292A         | 0.94364  | $\pi_{(\text{MCPO})-4f}$     |
| 12        | 413                 | 0.0000  | 281A→304A         | -0.24569 | $\pi_{(\text{MCPO})^-}$      |
|           |                     |         | 282A→302A         | -0.25950 | $\pi^*_{(\text{MCPO})}$      |
|           |                     |         | 283A→293A         | -0.28207 |                              |
|           |                     |         | 275B→298B         | 0.24635  |                              |
|           |                     |         | 276B→296B         | -0.26077 |                              |
|           |                     |         | 277B→286B         | 0.28416  |                              |
| 13        | 409                 | 0.0000  | 280A→303A         | -0.41025 | $\pi_{(\text{MCPO})^-}$      |
|           |                     |         | 272B→287B         | 0.31541  | $\pi^*_{(\text{MCPO})}$      |
|           |                     |         | 274B→297B         | 0.41173  |                              |
| 14        | 409                 | 0.0000  | 279A→293A         | -0.26371 | $\pi_{(\text{MCPO})^-}$      |
|           |                     |         | 281A→302A         | 0.30087  | $\pi^*_{(\text{MCPO})}$      |
|           |                     |         | 273B→286B         | 0.26670  |                              |

**Table S7.** Atomic orbital contribution to MOs appearing in the main configuration of the (a) first

and (b) second lowest  $\pi$ -4f CT excited state of **Eu-MCPO** in THF solvent using the optimized

structure (9th and 11th excited state in Table S6). There is very small mixing of the  $\pi$  orbitals of

MCPO and the 4f orbital of Eu.

| <b>MO</b> | 4f      | MCPO-1  | MCPO-2  | NO <sub>3</sub> |
|-----------|---------|---------|---------|-----------------|
| 289A      | 0.00011 | 0.00007 | 0.99621 | 0.00310         |
| 290A      | 0.00054 | 0.00058 | 0.99250 | 0.00512         |
| 292A      | 0.95651 | 0.00374 | 0.00467 | 0.03292         |

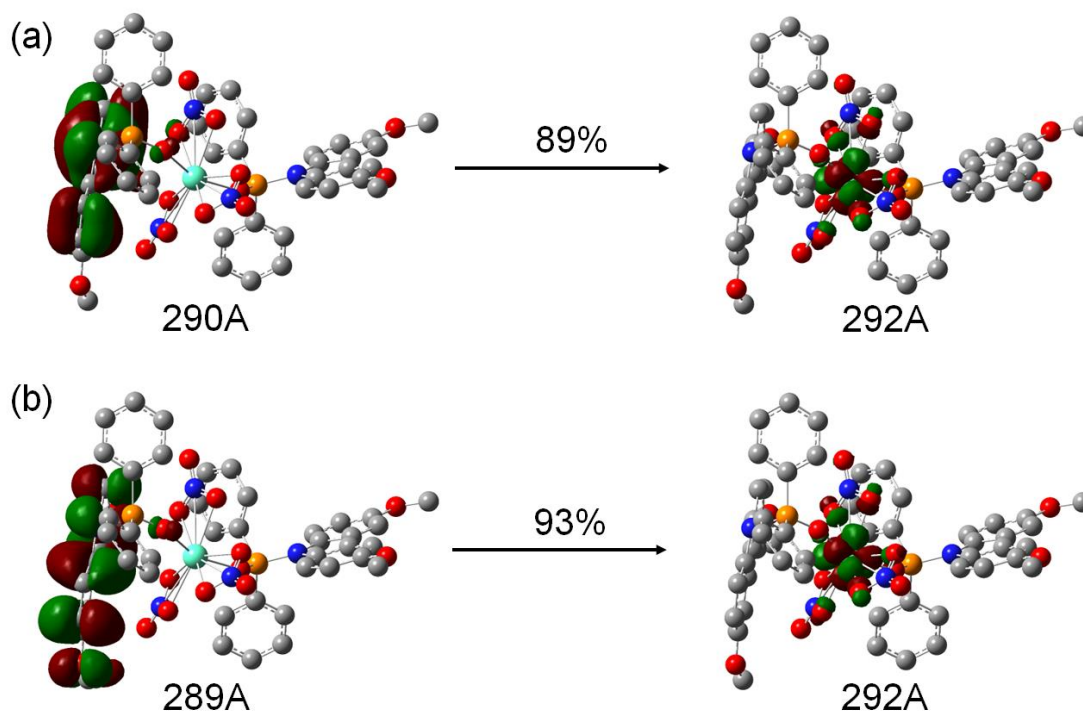

**Figure S13.** Transition orbital analysis of the (a) first and (b) second lowest  $\pi$ -4f CT excited state of **Eu-MCPO** in THF solvent using the optimized structure (9th and 11th excited state in Table S6).

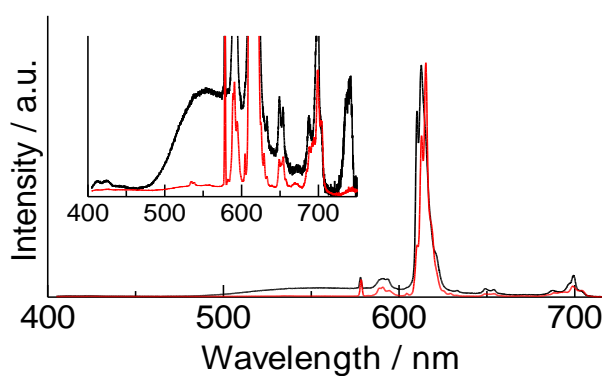

**Figure S14.** Emission spectra of **Eu-MCPO** in solid states at 300 K (black line) and 100 K (red line) under degassed condition.  $\lambda_{\text{ex}} = 368$  nm.

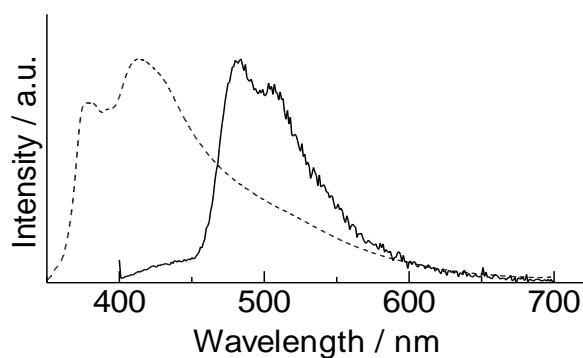

**Figure S15.** Emission spectra of MCPO in 2Me-THF at 100 K (broken line, 0.1 mM,  $\lambda_{\text{ex}} = 325$  nm) and **Gd-MCPO** in solid states at 100 K (solid line,  $\lambda_{\text{ex}} = 330$  nm, 20 msec delay). Normalized by intensity maxima.

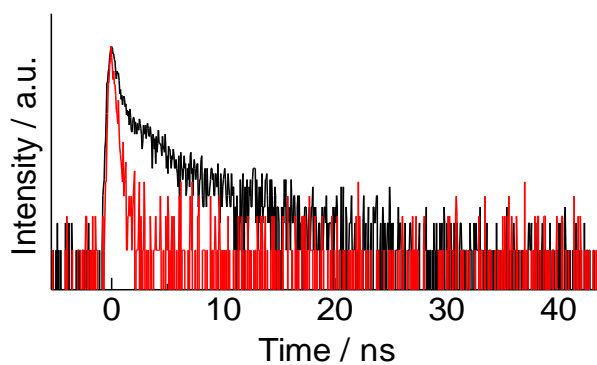

**Figure S16.** Emission decay of **Eu-MCPO** in solid states at 100 K under degassed condition (black line,  $\lambda_{\text{ex}} = 368$  nm,  $\lambda_{\text{em}} = 570$  nm). Prompt (red line).

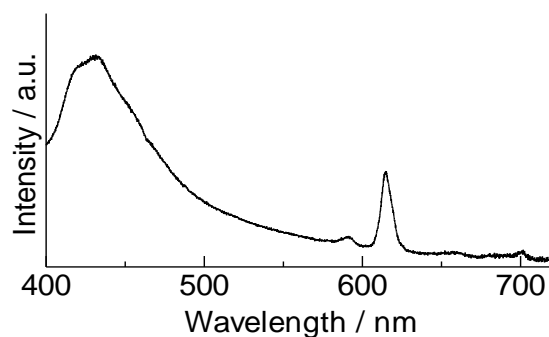

**Figure S17.** Emission spectrum of **Eu-MCPO-H<sub>2</sub>O** in solid state at 300 K under degassed condition ( $\lambda_{\text{ex}} = 330$  nm).



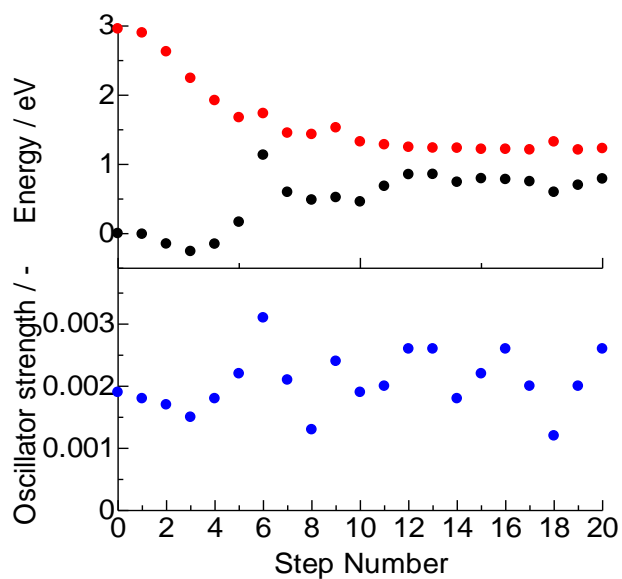

**Figure S18.** Structural relaxation of **Eu-MCPO** on the  $\pi$ -4f CT excited state in vacuum condition was approximately evaluated by excited-state optimization using TDDFT calculations. Changes of the  $\pi$ -4f CT-excited-state energies (red), ground-state energies (black), and oscillator strengths (blue) for first 20 steps during the optimization process on the lowest  $\pi$ -4f CT excited state (9th excited state in Table S2) were shown.

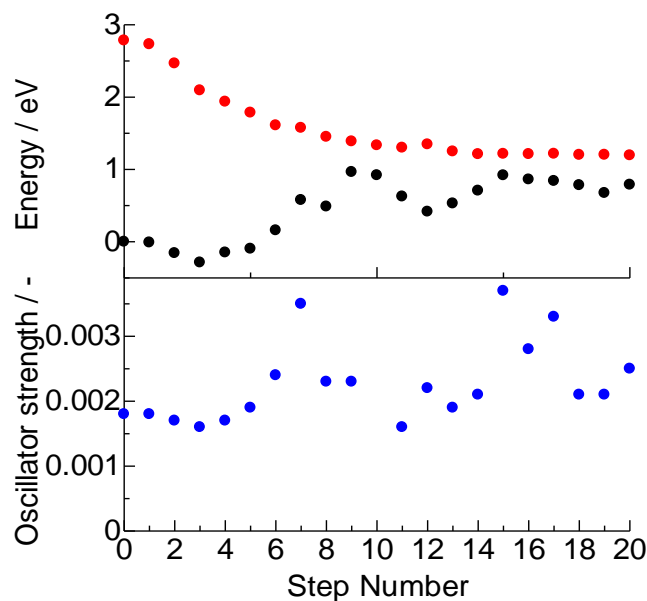

**Figure S19.** Structural relaxation of **Eu-MCPO** on the  $\pi$ -4f CT excited state in THF solvent was approximately evaluated by excited state optimization using TDDFT calculations with PCM method. Changes of the  $\pi$ -4f CT excited state energies (red), ground state energies (black), and oscillator strengths (blue) for first 20 steps during the optimization process on the lowest  $\pi$ -4f CT excited state (9th excited state in Table S6) were shown.

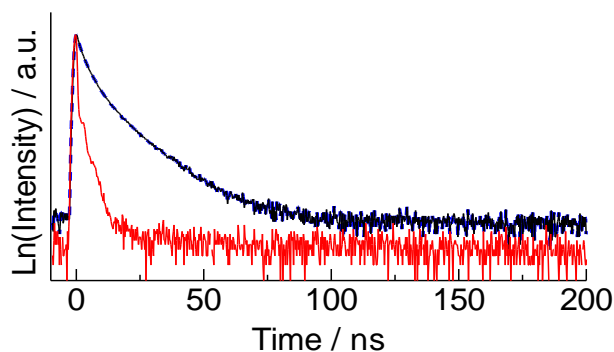

**Figure S20.** Emission decay of **Eu-MCPO** in  $\text{CHCl}_3$  at 300 K (black line,  $\lambda_{\text{ex}} = 375 \text{ nm}$ ,  $\lambda_{\text{em}} = 570 \text{ nm}$ ). Prompt (red line). Fitting curve assuming a double exponential decay (blue dashed line).

#### S4. Emission analyses of Eu-MCPO in the 2Me-THF condition

The emission spectra of **Eu-MCPO** at 100 and 300 K excited by the LMCT bands are shown in Figure S21. At low temperatures, a broad emission band at approximately 530 nm, as well as sharp 4f-4f emission bands at 579, 590, 610, 650, and 700 nm, were observed for **Eu-MCPO**. The broad emission band was considered to originate from the  $\pi$ -f charge-transfer excited states. The 4f-4f emission band decreased with increasing temperature, indicating that an energy transfer pathway between the  $^5D_0$  and  $\pi$ -4f CT excited states was present.

To confirm the energy transfer pathway, time-resolved emission spectra of **Eu-MCPO** in 2Me-THF (10 mM) at 300 K were estimated using the  $\pi$ -4f CT excitation ( $\lambda_{\text{ex}} = 440$  nm, Figure S22). A weak broad emission band at an upper baseline of approximately 560 nm—attributed to  $\pi$ -4f CT and the sharp emission band at 620 nm assigned to  $^5D_0 \rightarrow ^7F_2$  were observed at 0–10 ns and 95–105  $\mu$ s after excitation, respectively. These results suggest that an energy transfer pathway from the  $\pi$ -4f CT excited state to  $^5D_0$  was present. This photophysical behavior was also observed at 100 K (Figure S23). The emission decay curve for the  $\pi$ -4f CT emission band ( $\lambda_{\text{em}} = 570$  nm) at 300 K is shown in Figure S24. The **Eu-MCPO** in 2Me-THF exhibited a nanosecond-scale lifetime similar to that observed in the  $\text{CHCl}_3$  condition; however, determining the precise emission lifetime was difficult because of the strong overlapping IRF curve. Time-resolved emission spectra were also obtained using optical excitation at 400 nm, which was based on the

dual transition from the ground state to the MCPO  $S_1$  and  $\pi$ -4f CT states (Figure 2). Immediately after excitation, a broad emission was observed at approximately 440 nm (Figure S25a). This emission band mainly originated from the fluorescence of the MCPO ligand moiety (Figure S15). The emission bands at 535, 555, and 583 nm, which were observed within the hundreds-of-nanoseconds time frame (Figure S25b), were assigned to the transitions of  $^5D_1 \rightarrow ^7F_1$ ,  $^5D_1 \rightarrow ^7F_2$ , and  $^5D_1 \rightarrow ^7F_3$ , respectively.<sup>S13</sup> The bands at 590 and 615 had the longest lifetime (Figure S25c) and were assigned to  $^5D_0 \rightarrow ^7F_1$  and  $^5D_0 \rightarrow ^7F_2$ , respectively. These results indicated that  $^5D_0 \rightarrow ^7F_J$  emission by ligand excitation occurred *via* energy transfer from the MCPO  $T_1$  state to the  $^5D_1$  state.

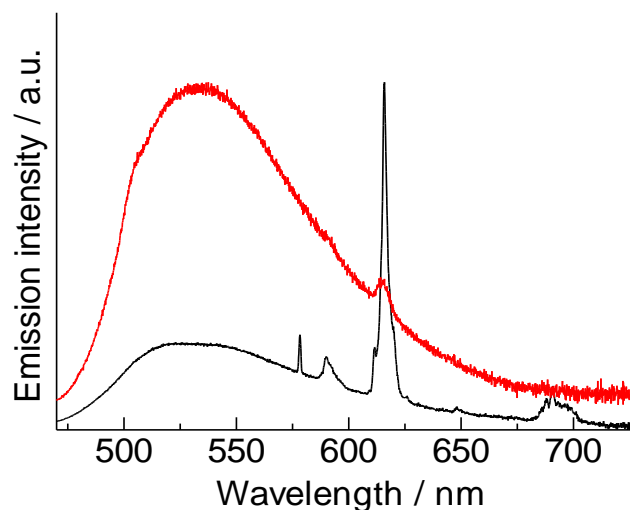

**Figure S21.** Emission spectra of **Eu-MCPO** in 2Me-THF at 300 K (black line,  $\lambda_{\text{ex}} = 440$  nm) and 100 K (red line,  $\lambda_{\text{ex}} = 440$  nm). Normalized by intensity maxima.

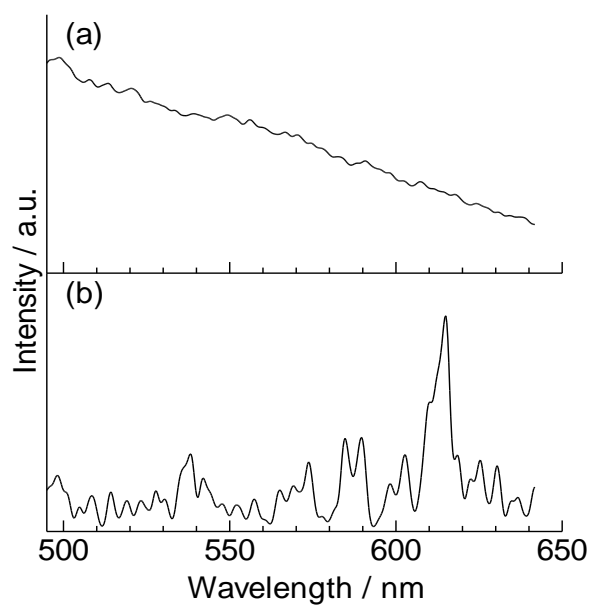

**Figure S22.** Time-resolved emission spectra of **Eu-MCPO** in 2Me-THF (10 mM) at 300 K excited by 440 nm. Emission spectra were obtained from the streak images by the time integration of (a) 0–10 ns and (b) 95–105  $\mu$ s.

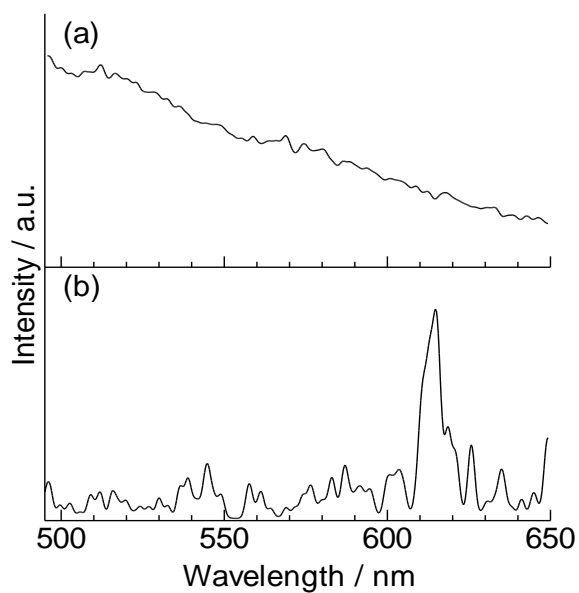

**Figure S23.** Time-resolved emission spectra of **Eu-MCPO** in 2Me-THF (10 mM) at 100 K excited by 440 nm. Emission spectra were obtained from the streak images by the time integration of (a) 0–10 ns and (b) 95–105  $\mu$ s.

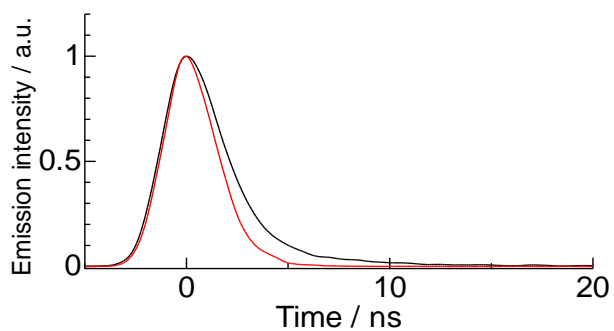

**Figure S24.** Emission decay curves of **Eu-MCPO** in 2Me-THF (10 mM) at 570 nm (black line) and instrumental response function (red line).

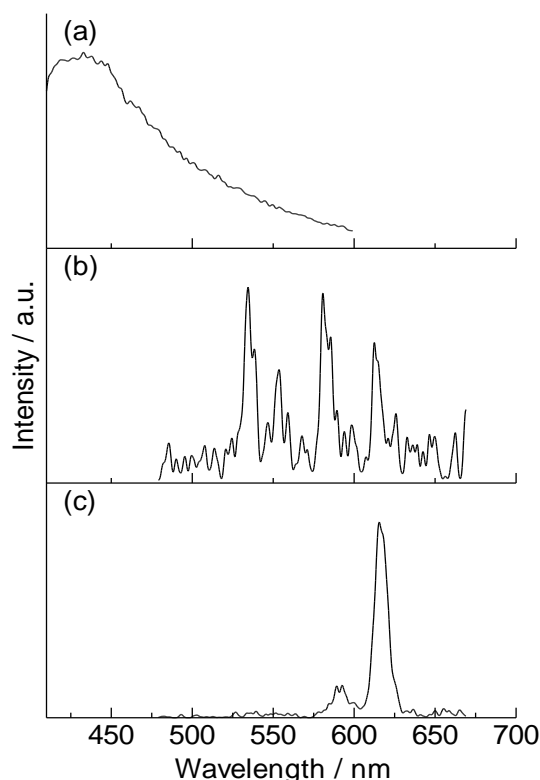

**Figure S25.** Time-resolved emission spectra of **Eu-MCPO** in 2Me-THF (10 mM) at 300 K excited by 400 nm. Normalized emission intensity spectra were obtained from the streak images by the time integration of (a) 0–1 ns, (b) 195–205 ns, and (c) 14.5–15.5  $\mu$ s.

## References

- S1. Frisch, M. J., Trucks, G. W., Schlegel, H. B., Scuseria, G. E., Robb, M. A., Cheeseman, J. R., Scalmani, G., Barone, V., Petersson, G. A., Nakatsuji, H., Li, X., Caricato, M., Marenich, A. V., Bloino, J., Janesko, B. G., Gomperts, R., Mennucci, B., Hratchian, H. P., Ortiz, J. V., Izmaylov, A. F., Sonnenberg, J. L., Williams-Young, D., Ding, F., Lipparini, F., Egidi, F., Goings, J., Peng, B., Petrone, A., Henderson, T., Ranasinghe, D., Zakrzewski, V. G., Gao, J., Rega, N., Zheng, G., Liang, W., Hada, M., Ehara, M., Toyota, K., Fukuda, R., Hasegawa, J., Ishida, M., Nakajima, T., Honda, Y., Kitao, O., Nakai, H., Vreven, T., Throssell, K., Montgomery, J. A., Jr., Peralta, J. E., Ogliaro, F., Bearpark, M. J., Heyd, J. J., Brothers, E. N., Kudin, K. N., Staroverov, V. N., Keith, T. A., Kobayashi, R., Normand, J.,

- Raghavachari, K., Rendell, A. P., Burant, J. C., Iyengar, S. S., Tomasi, J., Cossi, M., Millam, J. M., Klene, M., Adamo, C., Cammi, R., Ochterski, J. W., Martin, R. L., Morokuma, K., Farkas, O., Foresman, J. B., Fox, D. J. Gaussian, Inc., Wallingford CT, **2016**.
- S2. Becke A. D. Density-functional thermochemistry. III. The role of exact exchange. *J. Chem. Phys.* **1993**, 98, 5648–5652.
- S3. Stephens, P. J., Devlin, F. J., Chabalowski, C. F., Frisch, M. J. Ab initio calculation of vibrational absorption and circular dichroism spectra using density functional force fields. *J. Phys. Chem.* **1994**, 98, 11623–11627.
- S4. Grimme, S., Antony, J., Ehrlich, S., Krieg, H. A. Consistent and accurate Ab initio parametrization of density functional dispersion correction (DFT-D) for the 94 elements H-Pu cite. *J. Chem. Phys.* **2010**, 132, 154104.
- S5. Becke, A. D. Density-functional exchange-energy approximation with correct asymptotic behavior. *Phys. Rev. A* **1988**, 38, 3098–3100.
- S6. Lee, C., Yang, W., Parr, R. G. Development of the colle-salvetti correlation-energy formula into a functional of the electron density. *Phys. Rev. B* **1988**, 37, 785–789.
- S7. Tawada, Y., Tsuneda, T., Yanagisawa, S., Yanai, T., Hirao, K. A Long-range-corrected time-dependent density functional *J. Chem. Phys.* **2004**, 120, 8425–8433.
- S8. Dolg, M., Stoll, H., Savin, A., Preuss, H. Energy-adjusted pseudopotentials for the rare earth elements. *Theor. Chim. Acta* **1989**, 75, 173–194.
- S9. Dunning, T. H. Gaussian basis sets for use in correlated molecular calculations. I. The atoms boron through neon and hydrogen. *J. Chem. Phys.* **1989**, 90, 1007–1023.
- S10. Woon, D. E., Dunning, T. H. Gaussian basis sets for use in correlated molecular calculations. III. The atoms aluminum through Argon. *J. Chem. Phys.* **1993**, 98, 1358–1371.
- S11. Tomasi, J., Mennucci, B., Cammi, R. Quantum mechanical continuum solvation models. *Chem. Rev.* **2005**, 105, 2999–3093.
- S12. O'Boyle, N. M., Tenderholt, A. L., Langner, K. M. cclib: A library for package-independent computational chemistry algorithms. *J. Comp. Chem.* **2008**, 29, 839–845.
- S13. Ma, C.-G., Brik, M. G., Liu, D.-X., Feng, B., Tian, Y., Suchocki, A. Energy level schemes of  $f^N$  electronic configurations for the di-, tri-, and tetravalent lanthanides and actinides in a free state. *J. Lumin.* **2016**, 170, 369–374.
